# Supplementary material for: A Novel Hypothesis on Choroideremia-Manifesting Female Carriers: Could CHM In-Frame Variants Exert a Dominant Negative Effect? A Case Report
Source: MDPI journal article supplement (doi:10.3390/genes13071268), 2022-07-17
Supplement: s1 [file s1]

A

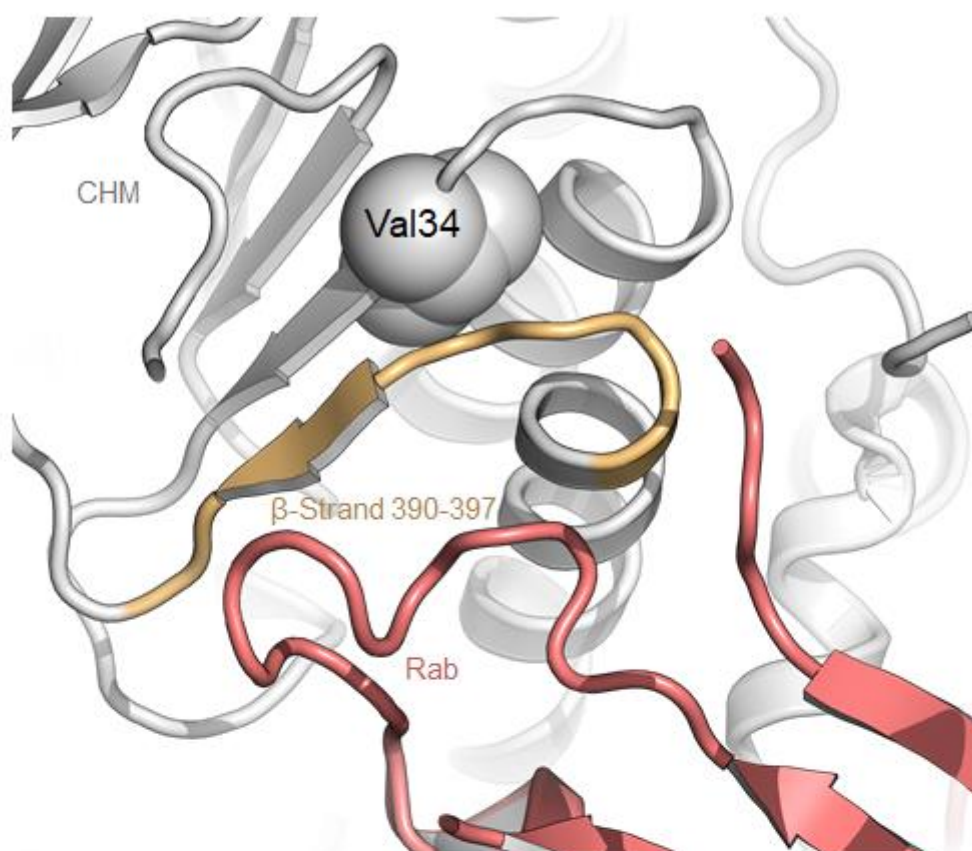

B

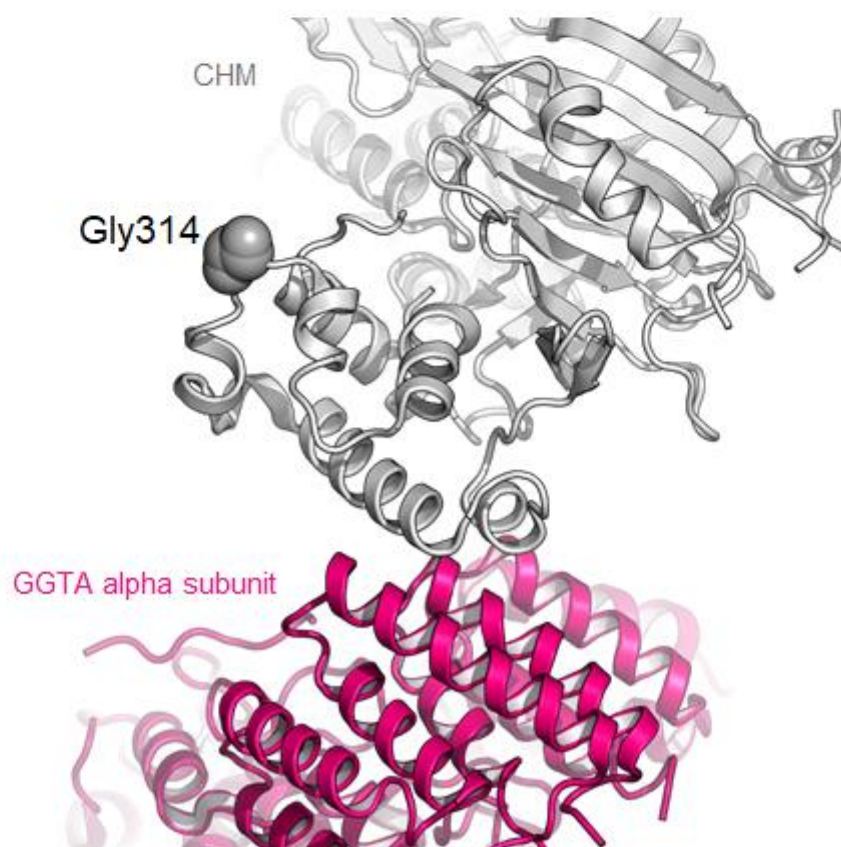

**Figure S1.** The p.Val34Asp and p.Gly314Arg variants mapped onto the structure of *CHM* (grey illustration). **(A)** Although it is unable to bind to Rab (pink illustrations) due to the distortion of interface residues 390–397, the p.Val34Asp mutant can still interact with GGTA (violet illustrations). **(B)** The p.Gly314Arg variant is present on the C-terminal surface of CHM but has no effect on either Rab binding nor GGTA binding.
